# Supplementary material for: Mapping small-effect and linked quantitative trait loci for complex traits in backcross or DH populations via a multi-locus GWAS methodology
Source: PubMed Central journal article supplement (PMC4951730; doi:10.1038/srep29951), 2016-07-20
Supplement: srep29951-s1.pdf [file srep29951-s1.pdf]

**Mapping small-effect and linked quantitative trait loci for complex traits in backcross or DH populations via a multi-locus GWAS methodology**

Shi-Bo Wang<sup>1,2</sup>, Yang-Jun Wen<sup>2</sup>, Wen-Long Ren<sup>2</sup>, Yuan-Li Ni<sup>2</sup>, Jin Zhang<sup>2</sup>,  
Jian-Ying Feng<sup>2</sup>, Yuan-Ming Zhang<sup>1</sup>

<sup>1</sup>Statistical Genomics Lab, College of Plant Science and Technology, Huazhong Agricultural University, Wuhan 430070, China. <sup>2</sup>State Key Laboratory of Crop Genetics and Germplasm Enhancement, Nanjing Agricultural University, Nanjing 210095, China.

Correspondence and requests for materials should be addressed to Y.-M.Z.  
(email: soyzhang@mail.hzau.edu.cn)

**Table S1 | True and estimated values for 20 simulated QTL parameters in backcross in simulation experiment I using GCIM under various QTL effect models and K matrices (200 replicates)**

| QTL | Position | Effect | r <sup>2</sup> (%) | Random QTL effect + K matrix from partial markers |                  |                | Fixed QTL effect + K matrix from partial markers |                  |                | Fixed QTL effect + K matrix from all the markers |                  |                |
|-----|----------|--------|--------------------|---------------------------------------------------|------------------|----------------|--------------------------------------------------|------------------|----------------|--------------------------------------------------|------------------|----------------|
|     |          |        |                    | Power (%)                                         | Effect (MSE,MAD) | Position (MSE) | Power (%)                                        | Effect (MSE,MAD) | Position (MSE) | Power (%)                                        | Effect (MSE,MAD) | Position (MSE) |
| 1   | 50       | 4.47   | 19.29              | 100                                               | 4.52(0.04,0.16)  | 50.14(1.05)    | 100                                              | 4.53(0.07,0.17)  | 50.14(1.06)    | 100                                              | 4.48(0.03,0.14)  | 49.95(0.35)    |
| 2   | 125      | 3.16   | 9.64               | 100                                               | 3.21(0.10,0.18)  | 125.05(1.19)   | 100                                              | 3.21(0.10,0.18)  | 125.03(1.19)   | 100                                              | 3.18(0.04,0.15)  | 125.12(0.72)   |
| 3   | 200      | -2.24  | 4.85               | 99.5                                              | -2.28(0.05,0.18) | 200.05(1.51)   | 99.5                                             | -2.27(0.06,0.19) | 200.05(1.49)   | 100                                              | -2.25(0.05,0.18) | 200.01(1.03)   |
| 4   | 235      | -1.58  | 2.41               | 98                                                | -1.59(0.05,0.17) | 234.85(3.28)   | 98                                               | -1.59(0.05,0.17) | 234.82(3.25)   | 98                                               | -1.57(0.04,0.16) | 234.98(2.94)   |
| 5   | 350      | 2.24   | 4.85               | 92.5                                              | 2.24(0.19,0.35)  | 349.65(1.90)   | 94                                               | 2.22(0.22,0.37)  | 349.56(1.94)   | 90                                               | 2.23(0.20,0.35)  | 350.69(2.89)   |
| 6   | 360      | 3.16   | 9.64               | 100                                               | 3.35(0.48,0.47)  | 360.05(1.51)   | 100                                              | 3.35(0.44,0.47)  | 360.09(1.59)   | 100                                              | 3.36(0.58,0.52)  | 359.37(1.76)   |
| 7   | 610      | 1.1    | 1.17               | 58.5                                              | 1.25(0.09,0.25)  | 609.57(4.55)   | 60.5                                             | 1.23(0.10,0.25)  | 609.60(4.68)   | 58.5                                             | 1.25(0.07,0.22)  | 609.91(3.87)   |
| 8   | 630      | -1.1   | 1.17               | 60.5                                              | -1.26(0.10,0.25) | 630.45(3.96)   | 61.5                                             | -1.25(0.11,0.26) | 630.50(4.26)   | 62.5                                             | -1.23(0.08,0.24) | 630.36(3.43)   |
| 9   | 800      | 0.77   | 0.57               | 61.5                                              | 0.85(0.03,0.14)  | 800.19(5.05)   | 63                                               | 0.85(0.03,0.14)  | 800.16(5.05)   | 66                                               | 0.83(0.03,0.13)  | 800.26(5.12)   |
| 10  | 890      | 1.73   | 2.89               | 95                                                | 1.73(0.10,0.25)  | 889.99(2.69)   | 94                                               | 1.74(0.10,0.25)  | 890.03(2.74)   | 97.5                                             | 1.77(0.09,0.23)  | 890.40(2.96)   |
| 11  | 905      | 3.81   | 14.02              | 100                                               | 4.01(0.34,0.42)  | 905.03(1.05)   | 100                                              | 4.02(0.37,0.43)  | 905.08(1.10)   | 100                                              | 3.81(0.15,0.31)  | 905.06(0.89)   |
| 12  | 920      | 2.25   | 4.89               | 96                                                | 2.22(0.15,0.31)  | 920.02(1.86)   | 96.5                                             | 2.19(0.15,0.31)  | 920.06(1.86)   | 100                                              | 2.23(0.12,0.27)  | 919.66(1.92)   |
| 13  | 1100     | -1.3   | 1.63               | 94.5                                              | -1.34(0.03,0.14) | 1099.87(2.67)  | 95                                               | -1.34(0.03,0.15) | 1099.86(2.68)  | 96.5                                             | -1.33(0.03,0.14) | 1099.97(2.51)  |
| 14  | 1210     | -1     | 0.97               | 86.5                                              | -1.02(0.03,0.14) | 1210.05(4.47)  | 87                                               | -1.02(0.03,0.14) | 1210.08(4.69)  | 87.5                                             | -1.02(0.03,0.14) | 1210.17(4.51)  |
| 15  | 1305     | -2.24  | 4.85               | 100                                               | -2.28(0.06,0.20) | 1304.86(1.67)  | 100                                              | -2.28(0.07,0.21) | 1304.84(1.70)  | 100                                              | -2.25(0.05,0.18) | 1304.89(1.28)  |
| 16  | 1335     | 1.58   | 2.41               | 88                                                | 2.21(0.59,0.68)  | 1335.70(2.89)  | 86.5                                             | 2.21(0.58,0.67)  | 1335.67(2.92)  | 88                                               | 2.18(0.54,0.65)  | 1335.69(2.83)  |
| 17  | 1345     | 1      | 0.97               | 26                                                | 1.88(1.03,0.88)  | 1344.33(3.13)  | 28                                               | 1.90(1.09,0.90)  | 1344.29(3.29)  | 28.5                                             | 1.81(0.97,0.81)  | 1344.40(3.12)  |
| 18  | 1365     | -1.73  | 2.89               | 97                                                | -1.62(0.10,0.26) | 1365.30(2.29)  | 97                                               | -1.63(0.10,0.27) | 1365.33(2.21)  | 98                                               | -1.62(0.10,0.26) | 1365.20(1.87)  |
| 19  | 1800     | 0.71   | 0.49               | 59.5                                              | 0.81(0.03,0.14)  | 1799.97(5.31)  | 58                                               | 0.81(0.03,0.14)  | 1800.17(5.40)  | 63.5                                             | 0.79(0.03,0.12)  | 1799.93(7.36)  |
| 20  | 2300     | 0.89   | 0.76               | 77.5                                              | 0.94(0.03,0.13)  | 2300.19(3.36)  | 78.5                                             | 0.94(0.03,0.13)  | 2300.16(3.37)  | 80.5                                             | 0.93(0.03,0.13)  | 2300.22(4.13)  |

SD: standard deviation; MSE: mean squared error; MAD: mean absolute deviation. The same is true for the later tables.

**Table S2 | True and estimated values for 20 simulated QTL parameters in backcross in simulation experiment II using GCIM under various QTL effect models and K matrices (200 replicates)**

| QTL | Position | Effect | r <sup>2</sup> (%) | Random QTL effect + K matrix from partial markers |                  |                | Fixed QTL effect + K matrix from partial markers |                  |                | Fixed QTL effect + K matrix from all the markers |                  |                |
|-----|----------|--------|--------------------|---------------------------------------------------|------------------|----------------|--------------------------------------------------|------------------|----------------|--------------------------------------------------|------------------|----------------|
|     |          |        |                    | Power (%)                                         | Effect (MSE,MAD) | Position (MSE) | Power (%)                                        | Effect (MSE,MAD) | Position (MSE) | Power (%)                                        | Effect (MSE,MAD) | Position (MSE) |
| 1   | 50       | 4.47   | 19.29              | 100                                               | 4.54(0.17,0.32)  | 50.12(1.02)    | 100                                              | 4.55(0.19,0.32)  | 50.07(1.02)    | 100                                              | 4.47(0.14,0.30)  | 50.03(0.45)    |
| 2   | 125      | 3.16   | 9.64               | 99.5                                              | 3.19(0.15,0.29)  | 125.02(1.33)   | 98                                               | 3.18(0.13,0.29)  | 125.02(1.32)   | 100                                              | 3.15(0.12,0.28)  | 124.99(0.84)   |
| 3   | 200      | -2.24  | 4.85               | 99.5                                              | -2.26(0.11,0.26) | 200.21(1.64)   | 99                                               | -2.25(0.13,0.28) | 200.20(1.66)   | 99                                               | -2.24(0.12,0.27) | 200.08(1.51)   |
| 4   | 235      | -1.58  | 2.41               | 96.5                                              | -1.62(0.12,0.27) | 234.89(2.72)   | 96.5                                             | -1.63(0.12,0.28) | 234.89(2.76)   | 97                                               | -1.63(0.12,0.27) | 234.99(2.52)   |
| 5   | 350      | 2.24   | 4.85               | 87                                                | 2.34(0.31,0.40)  | 349.51(1.86)   | 88                                               | 2.35(0.27,0.40)  | 349.52(1.84)   | 81                                               | 2.30(0.28,0.41)  | 350.49(2.78)   |
| 6   | 360      | 3.16   | 9.64               | 98.5                                              | 3.44(0.68,0.58)  | 359.90(1.64)   | 99.5                                             | 3.41(0.67,0.58)  | 360.03(1.56)   | 99                                               | 3.53(0.91,0.71)  | 359.18(2.05)   |
| 7   | 610      | 1.1    | 1.17               | 41.5                                              | 1.25(0.12,0.27)  | 609.54(3.16)   | 44.5                                             | 1.26(0.12,0.27)  | 609.58(2.69)   | 41.5                                             | 1.28(0.13,0.28)  | 609.64(3.01)   |
| 8   | 630      | -1.1   | 1.17               | 39.5                                              | -1.33(0.18,0.34) | 630.37(4.16)   | 42.5                                             | -1.31(0.15,0.30) | 630.40(3.86)   | 42                                               | -1.28(0.16,0.31) | 630.06(3.54)   |
| 9   | 800      | 0.77   | 0.57               | 41                                                | 1.04(0.15,0.29)  | 799.72(4.99)   | 43                                               | 1.03(0.13,0.28)  | 799.93(5.26)   | 43.5                                             | 0.99(0.11,0.25)  | 800.21(4.78)   |
| 10  | 890      | 1.73   | 2.89               | 83                                                | 1.82(0.18,0.33)  | 890.20(2.81)   | 83.5                                             | 1.82(0.15,0.31)  | 890.20(2.93)   | 93.5                                             | 1.80(0.15,0.32)  | 890.56(3.20)   |
| 11  | 905      | 3.81   | 14.02              | 99.5                                              | 4.07(0.59,0.58)  | 904.97(1.13)   | 99.5                                             | 4.06(0.59,0.56)  | 904.96(1.16)   | 100                                              | 3.84(0.32,0.42)  | 905.06(1.01)   |
| 12  | 920      | 2.25   | 4.89               | 95                                                | 2.23(0.21,0.34)  | 919.83(2.33)   | 96                                               | 2.23(0.23,0.36)  | 919.85(2.43)   | 98                                               | 2.23(0.18,0.33)  | 919.42(2.49)   |
| 13  | 1100     | -1.3   | 1.63               | 86                                                | -1.34(0.10,0.25) | 1099.98(3.74)  | 86.5                                             | -1.34(0.10,0.25) | 1100.03(3.77)  | 85                                               | -1.33(0.09,0.23) | 1099.82(3.48)  |
| 14  | 1210     | -1     | 0.97               | 69                                                | -1.15(0.11,0.26) | 1209.84(4.10)  | 69                                               | -1.14(0.11,0.26) | 1209.81(4.09)  | 71.5                                             | -1.16(0.12,0.26) | 1209.85(4.24)  |
| 15  | 1305     | -2.24  | 4.85               | 100                                               | -2.28(0.13,0.28) | 1304.98(1.72)  | 100                                              | -2.28(0.12,0.28) | 1304.95(1.73)  | 99                                               | -2.26(0.12,0.28) | 1304.99(1.44)  |
| 16  | 1335     | 1.58   | 2.41               | 78                                                | 2.29(0.72,0.75)  | 1335.59(2.65)  | 77                                               | 2.27(0.71,0.74)  | 1335.55(2.65)  | 81.5                                             | 2.27(0.68,0.73)  | 1335.52(2.91)  |
| 17  | 1345     | 1      | 0.97               | 29                                                | 2.10(1.44,1.10)  | 1344.22(2.95)  | 30.5                                             | 2.09(1.42,1.09)  | 1344.18(2.95)  | 26                                               | 2.03(1.34,1.03)  | 1344.27(2.73)  |
| 18  | 1365     | -1.73  | 2.89               | 92.5                                              | -1.67(0.14,0.30) | 1365.32(1.93)  | 91.5                                             | -1.68(0.14,0.29) | 1365.33(1.95)  | 93.5                                             | -1.65(0.14,0.29) | 1365.19(1.59)  |
| 19  | 1800     | 0.71   | 0.49               | 40.5                                              | 1.05(0.20,0.35)  | 1799.67(5.15)  | 39.5                                             | 1.05(0.19,0.35)  | 1799.79(4.90)  | 43.5                                             | 1.02(0.17,0.31)  | 1799.53(5.09)  |
| 20  | 2300     | 0.89   | 0.76               | 54.5                                              | 1.06(0.08,0.22)  | 2299.74(4.51)  | 54.5                                             | 1.07(0.09,0.23)  | 2299.77(4.67)  | 56                                               | 1.05(0.09,0.23)  | 2299.76(4.62)  |

**Table S3 | True and estimated values for 20 simulated QTL parameters in backcross in simulation experiment III using GCIM under various QTL effect models and K matrices (200 replicates)**

| QTL | Position | Effect | r <sup>2</sup> (%) | Random QTL effect + K matrix from partial markers |                  |                | Fixed QTL effect + K matrix from partial markers |                  |                | Fixed QTL effect + K matrix from all the markers |                  |                |
|-----|----------|--------|--------------------|---------------------------------------------------|------------------|----------------|--------------------------------------------------|------------------|----------------|--------------------------------------------------|------------------|----------------|
|     |          |        |                    | Power (%)                                         | Effect (MSE,MAD) | Position (MSE) | Power (%)                                        | Effect (MSE,MAD) | Position (MSE) | Power (%)                                        | Effect (MSE,MAD) | Position (MSE) |
| 1   | 50       | 4.47   | 19.29              | 100                                               | 4.53(0.12,0.25)  | 50.10(1.14)    | 100                                              | 4.52(0.12,0.25)  | 50.09(1.15)    | 100                                              | 4.50(0.11,0.24)  | 50.04(0.61)    |
| 2   | 125      | 3.16   | 9.64               | 99                                                | 3.20(0.08,0.23)  | 124.95(1.67)   | 99.5                                             | 3.21(0.09,0.23)  | 125.00(1.66)   | 100                                              | 3.18(0.09,0.23)  | 125.01(1.31)   |
| 3   | 200      | -2.24  | 4.85               | 99                                                | -2.34(0.16,0.31) | 200.11(2.76)   | 99                                               | -2.33(0.15,0.29) | 200.09(2.76)   | 98.5                                             | -2.30(0.13,0.29) | 199.97(2.45)   |
| 4   | 235      | -1.58  | 2.41               | 84                                                | -1.61(0.10,0.26) | 234.68(4.02)   | 85.5                                             | -1.62(0.10,0.26) | 234.67(4.05)   | 86                                               | -1.61(0.11,0.27) | 234.75(3.87)   |
| 5   | 350      | 2.24   | 4.85               | 70.5                                              | 2.53(0.47,0.48)  | 349.87(2.34)   | 72                                               | 2.57(0.63,0.52)  | 349.84(2.41)   | 62                                               | 2.68(0.86,0.59)  | 350.85(3.48)   |
| 6   | 360      | 3.16   | 9.64               | 98                                                | 3.63(1.36,0.88)  | 359.96(1.95)   | 96.5                                             | 3.63(1.33,0.86)  | 360.01(1.95)   | 95                                               | 3.80(1.72,1.03)  | 359.43(2.22)   |
| 7   | 610      | 1.1    | 1.17               | 12                                                | 1.54(0.31,0.46)  | 608.88(5.13)   | 12                                               | 1.51(0.29,0.43)  | 608.88(5.04)   | 15.5                                             | 1.45(0.22,0.39)  | 609.19(5.00)   |
| 8   | 630      | -1.1   | 1.17               | 11                                                | -1.50(0.25,0.44) | 630.36(4.55)   | 11.5                                             | -1.47(0.23,0.42) | 630.13(3.52)   | 12                                               | -1.56(0.32,0.52) | 630.13(2.71)   |
| 9   | 800      | 0.77   | 0.57               | 25.5                                              | 1.09(0.12,0.32)  | 800.31(3.57)   | 27                                               | 1.09(0.12,0.32)  | 800.26(3.44)   | 27.5                                             | 1.07(0.11,0.30)  | 800.36(4.55)   |
| 10  | 890      | 1.73   | 2.89               | 69                                                | 1.95(0.18,0.33)  | 890.49(3.91)   | 66.5                                             | 1.95(0.16,0.33)  | 890.55(4.25)   | 70.5                                             | 1.96(0.17,0.32)  | 890.92(4.30)   |
| 11  | 905      | 3.81   | 14.02              | 99.5                                              | 4.27(0.19,0.83)  | 904.83(1.60)   | 100                                              | 4.32(1.33,0.88)  | 904.85(1.56)   | 99.5                                             | 4.12(1.00,0.74)  | 904.96(1.43)   |
| 12  | 920      | 2.25   | 4.89               | 93                                                | 2.28(0.24,0.38)  | 919.79(3.26)   | 91                                               | 2.29(0.20,0.36)  | 919.77(3.28)   | 95                                               | 2.28(0.18,0.34)  | 919.25(3.55)   |
| 13  | 1100     | -1.3   | 1.63               | 79                                                | -1.38(0.08,0.22) | 1100.15(4.10)  | 80                                               | -1.38(0.08,0.22) | 1100.14(4.04)  | 81.5                                             | -1.36(0.07,0.21) | 1100.13(4.40)  |
| 14  | 1210     | -1     | 0.97               | 46.5                                              | -1.17(0.06,0.19) | 1210.22(5.20)  | 46                                               | -1.17(0.06,0.19) | 1210.24(5.28)  | 52.5                                             | -1.17(0.07,0.20) | 1210.13(6.50)  |
| 15  | 1305     | -2.24  | 4.85               | 97                                                | -2.28(0.20,0.35) | 1305.03(2.72)  | 96.5                                             | -2.27(0.20,0.35) | 1304.98(2.71)  | 97.5                                             | -2.26(0.18,0.33) | 1305.10(2.61)  |
| 16  | 1335     | 1.58   | 2.41               | 75                                                | 2.29(0.73,0.75)  | 1335.63(3.45)  | 73.5                                             | 2.29(0.71,0.74)  | 1335.67(3.44)  | 77                                               | 2.27(0.68,0.73)  | 1335.63(3.63)  |
| 17  | 1345     | 1      | 0.97               | 19                                                | 2.33(2.02,1.33)  | 1343.84(5.26)  | 19.5                                             | 2.30(1.98,1.30)  | 1343.97(4.77)  | 18.5                                             | 2.31(1.97,1.31)  | 1344.38(4.73)  |
| 18  | 1365     | -1.73  | 2.89               | 78                                                | -1.65(0.12,0.28) | 1365.74(3.27)  | 76                                               | -1.66(0.11,0.28) | 1365.72(3.16)  | 79.5                                             | -1.63(0.12,0.29) | 1365.55(3.14)  |
| 19  | 1800     | 0.71   | 0.49               | 22.5                                              | 1.05(0.14,0.34)  | 1799.47(7.64)  | 23                                               | 1.05(0.14,0.34)  | 1799.35(6.96)  | 22.5                                             | 1.03(0.12,0.32)  | 1799.33(7.64)  |
| 20  | 2300     | 0.89   | 0.76               | 34                                                | 1.16(0.11,0.27)  | 2300.12(5.06)  | 32.5                                             | 1.16(0.11,0.28)  | 2300.02(4.60)  | 37                                               | 1.13(0.10,0.25)  | 230.10(5.50)   |

**Table S4 | Comparison of genome-wide composite interval mapping (CIM) with CIM and empirical Bayes in backcross with 400 individuals and 20 simulated main-effect QTL (200 replicates)**

| QTL | Position | Effect | r <sup>2</sup> (%) | Genome-wide CIM (GCIM) |                       |                    | CIM      |                       |                    | Empirical Bayes |                       |                    |
|-----|----------|--------|--------------------|------------------------|-----------------------|--------------------|----------|-----------------------|--------------------|-----------------|-----------------------|--------------------|
|     |          |        |                    | Power(%)               | Effect(SD,MSE,MAD)    | Position(SD,MSE)   | Power(%) | Effect(SD,MSE,MAD)    | Position(SD,MSE)   | Power(%)        | Effect(SD,MSE,MAD)    | Position(SD,MSE)   |
| 1   | 50       | 4.47   | 19.29              | 100                    | 4.47(0.18,0.03,0.14)  | 49.99(0.58,0.34)   | 99.5     | 4.50(0.28,0.08,0.22)  | 49.95(0.54,0.30)   | 100             | 4.47(0.17,0.03,0.14)  | 50(0,0)            |
| 2   | 125      | 3.16   | 9.64               | 100                    | 3.17(0.19,0.04,0.15)  | 125.1(0.84,0.71)   | 99.5     | 3.05(0.37,0.15,0.31)  | 124.97(0.97,0.94)  | 100             | 3.14(0.19,0.04,0.15)  | 124.99(0.20,0.04)  |
| 3   | 200      | -2.24  | 4.85               | 100                    | -2.25(0.23,0.05,0.18) | 200.01(1.01,1.03)  | 94.5     | -2.81(0.57,0.64,0.70) | 200.62(1.15,1.69)  | 100             | -2.24(0.20,0.04,0.16) | 200(0,0)           |
| 4   | 235      | -1.58  | 2.41               | 98                     | -1.58(0.20,0.04,0.16) | 234.97(1.73,2.98)  | 84       | -1.78(0.63,0.44,0.45) | 234.78(1.86,3.51)  | 99              | -1.56(0.19,0.04,0.15) | 234.97(1.55,2.40)  |
| 5   | 350      | 2.24   | 4.85               | 91.5                   | 2.23(0.42,0.17,0.33)  | 350.53(1.54,2.63)  | 73.5     | 4.88(0.31,7.04,2.64)  | 352.55(1.10,7.71)  | 99.5            | 2.23(0.29,0.08,0.24)  | 350.02(0.35,0.13)  |
| 6   | 360      | 3.16   | 9.64               | 100                    | 3.34(0.68,0.50,0.47)  | 359.45(1.15,1.62)  | 94       | 4.98(0.29,3.41,1.82)  | 358.46(1.02,3.41)  | 100             | 3.16(0.30,0.09,0.23)  | 360.01(0.13,0.02)  |
| 7   | 610      | 1.1    | 1.17               | 60.5                   | 1.25(0.24,0.08,0.23)  | 609.88(2.06,4.21)  | 1        | 0.98(0.03,0.01,0.12)  | 607(1.41,10)       | 54              | 1.22(0.21,0.06,0.20)  | 610.05(1.99,3.94)  |
| 8   | 630      | -1.1   | 1.17               | 64                     | -1.24(0.26,0.09,0.24) | 630.29(1.96,3.90)  | 2        | -0.98(0.04,0.02,0.12) | 632.5(1.91,9)      | 56.5            | -1.22(0.23,0.07,0.22) | 630.04(1.95,3.76)  |
| 9   | 800      | 0.77   | 0.57               | 66                     | 0.83(0.15,0.03,0.13)  | 800.17(2.33,5.43)  | 35       | 1.15(0.16,0.17,0.38)  | 800.74(2.79,8.23)  | 64              | 0.83(0.14,0.02,0.12)  | 800.20(2.46,6.05)  |
| 10  | 890      | 1.73   | 2.89               | 98.5                   | 1.78(0.29,0.08,0.23)  | 890.34(1.68,2.93)  | 77       | 2.04(0.46,0.30,0.39)  | 889.72(1.39,1.99)  | 100             | 1.75(0.25,0.06,0.20)  | 889.88(0.93,0.88)  |
| 11  | 905      | 3.81   | 14.02              | 100                    | 3.79(0.40,0.16,0.31)  | 905.08(0.88,0.78)  | 98.5     | 6.83(0.45,9.30,3.03)  | 905.11(1.06,1.32)  | 100             | 3.82(0.32,0.10,0.25)  | 905(0,0)           |
| 12  | 920      | 2.25   | 4.89               | 100                    | 2.23(0.33,0.11,0.26)  | 919.69(1.33,1.86)  | 91.5     | 2.41(0.94,0.91,0.49)  | 919.82(1.39,1.96)  | 100             | 2.22(0.27,0.07,0.22)  | 920(0,0)           |
| 13  | 1100     | -1.3   | 1.63               | 96.5                   | -1.33(0.17,0.03,0.14) | 1100.04(1.57,2.46) | 87       | -1.46(0.24,0.08,0.23) | 1100.13(1.97,3.87) | 96.5            | -1.32(0.16,0.03,0.13) | 1099.97(1.20,1.42) |
| 14  | 1210     | -1     | 0.97               | 88                     | -1.02(0.17,0.03,0.14) | 1210.08(2.19,4.78) | 74.5     | -1.44(0.26,0.26,0.44) | 1209.92(2.39,5.69) | 89              | -1.01(0.17,0.03,0.13) | 1209.94(2.38,5.62) |
| 15  | 1305     | -2.24  | 4.85               | 100                    | -2.25(0.24,0.06,0.19) | 1304.88(1.13,1.29) | 94       | -1.65(0.25,0.41,0.59) | 1304.11(1.24,2.32) | 100             | -2.22(0.25,0.06,0.20) | 1304.98(0.35,0.13) |
| 16  | 1335     | 1.58   | 2.41               | 90                     | 2.17(0.43,0.53,0.65)  | 1335.68(1.56,2.88) | 0        |                       |                    | 96              | 1.95(0.44,0.33,0.49)  | 1335.40(1.70,3.02) |
| 17  | 1345     | 1      | 0.97               | 27.5                   | 1.74(0.55,0.84,0.74)  | 1344.49(1.62,2.84) | 0.05     | 0.90(0,0.01,0.10)     | 1340(0,25)         | 35              | 1.39(0.32,0.26,0.40)  | 1344.97(0.29,0.08) |
| 18  | 1365     | -1.73  | 2.89               | 98                     | -1.61(0.29,0.10,0.26) | 1365.23(1.37,1.93) | 50       | -1.14(0.18,0.38,0.60) | 1365.83(1.69,3.51) | 98.5            | -1.56(0.32,0.13,0.29) | 1365.03(0.94,0.89) |
| 19  | 1800     | 0.71   | 0.49               | 61.5                   | 0.79(0.14,0.03,0.12)  | 1799.86(2.74,7.44) | 16.5     | 1.07(0.11,0.14,0.36)  | 1799.61(2.66,7)    | 61.5            | 0.79(0.13,0.02,0.11)  | 1800.08(3.00,8.94) |
| 20  | 2300     | 0.89   | 0.76               | 81                     | 0.93(0.16,0.03,0.13)  | 2300.31(2.05,4.29) | 45       | 1.13(0.16,0.08,0.24)  | 2299.81(2.25,5.06) | 83.5            | 0.93(0.15,0.02,0.12)  | 2300.51(2.24,5.24) |

**Table S5 | Comparison of genome-wide composite interval mapping (CIM) with CIM and empirical Bayes in backcross with 400 individuals, 20 simulated QTL and polygenic background (200 replicates)**

| QTL | Position | Effect | r <sup>2</sup> (%) | Genome-wide CIM (GCIM) |                       |                    | CIM      |                       |                    | Empirical Bayes |                       |                    |
|-----|----------|--------|--------------------|------------------------|-----------------------|--------------------|----------|-----------------------|--------------------|-----------------|-----------------------|--------------------|
|     |          |        |                    | Power(%)               | Effect(SD,MSE,MAD)    | Position(SD,MSE)   | Power(%) | Effect(SD,MSE,MAD)    | Position(SD,MSE)   | Power(%)        | Effect(SD,MSE,MAD)    | Position(SD,MSE)   |
| 1   | 50       | 4.47   | 18.41              | 100                    | 4.47(0.37,0.14,0.30)  | 50.04(0.66,0.44)   | 99.5     | 4.49(0.40,0.16,0.32)  | 50.03(0.75,0.56)   | 100             | 4.44(0.38,0.14,0.30)  | 50.01(0.10,0.01)   |
| 2   | 125      | 3.16   | 9.20               | 100                    | 3.14(0.36,0.13,0.28)  | 124.96(0.90,0.81)  | 100      | 2.98(0.48,0.26,0.42)  | 124.88(1.07,1.15)  | 100             | 3.12(0.34,0.11,0.27)  | 125(0,0)           |
| 3   | 200      | -2.24  | 4.62               | 99.5                   | -2.23(0.34,0.12,0.27) | 200.09(1.22,1.49)  | 89       | -2.74(0.61,0.62,0.66) | 200.55(1.58,2.79)  | 99              | -2.20(0.33,0.11,0.26) | 200.05(0.71,0.51)  |
| 4   | 235      | -1.58  | 2.30               | 96.5                   | -1.63(0.34,0.12,0.27) | 235.05(1.59,2.52)  | 79.5     | -1.95(0.66,0.57,0.53) | 234.62(1.70,3.01)  | 97              | -1.63(0.32,0.10,0.25) | 234.90(1.13,1.29)  |
| 5   | 350      | 2.24   | 4.62               | 86                     | 2.27(0.49,0.24,0.39)  | 350.34(1.58,2.60)  | 71.5     | 4.97(0.62,7.84,2.73)  | 352.39(1.22,7.18)  | 98              | 2.28(0.40,0.16,0.32)  | 349.92(0.94,0.89)  |
| 6   | 360      | 3.16   | 9.20               | 99.5                   | 3.45(0.83,0.76,0.65)  | 359.32(1.14,1.74)  | 91       | 5.03(0.38,3.65,1.87)  | 358.45(1.11,3.62)  | 100             | 3.19(0.48,0.23,0.35)  | 359.99(0.16,0.03)  |
| 7   | 610      | 1.1    | 1.11               | 42                     | 1.23(0.32,0.12,0.27)  | 609.62(1.70,3.00)  | 6.5      | 1.17(0.20,0.04,0.14)  | 609.62(0.51,0.38)  | 38.5            | 1.21(0.28,0.09,0.24)  | 609.48(1.54,2.60)  |
| 8   | 630      | -1.1   | 1.11               | 41                     | -1.29(0.35,0.16,0.31) | 629.88(1.79,3.17)  | 5        | -1.16(0.23,0.05,0.16) | 631.4(1.78,4.8)    | 39              | -1.21(0.31,0.11,0.27) | 630.67(3.75,14.32) |
| 9   | 800      | 0.77   | 0.55               | 44.5                   | 1.00(0.27,0.12,0.26)  | 800.03(2.38,5.58)  | 29.5     | 1.29(0.26,0.33,0.52)  | 799.95(2.69,7.10)  | 43              | 1.02(0.27,0.13,0.28)  | 800.12(2.76,7.56)  |
| 10  | 890      | 1.73   | 2.76               | 91                     | 1.81(0.39,0.16,0.33)  | 890.44(1.67,2.96)  | 67.5     | 2.28(0.84,1.00,0.62)  | 889.73(1.63,2.70)  | 97              | 1.78(0.34,0.12,0.28)  | 889.95(1.35,1.80)  |
| 11  | 905      | 3.81   | 13.37              | 100                    | 3.87(0.59,0.34,0.44)  | 905.09(0.98,0.96)  | 99.5     | 6.79(0.69,9.33,3.00)  | 905.08(1.19,1.41)  | 100             | 3.81(0.44,0.20,0.33)  | 905.83(0.14,0.02)  |
| 12  | 920      | 2.25   | 4.66               | 98.5                   | 2.22(0.41,0.17,0.33)  | 919.57(1.43,2.21)  | 86       | 2.51(0.90,0.87,0.54)  | 919.84(1.48,2.19)  | 99.5            | 2.20(0.38,0.14,0.30)  | 920(0.71,0.50)     |
| 13  | 1100     | -1.3   | 1.56               | 84.5                   | -1.33(0.31,0.10,0.24) | 1099.88(1.90,3.59) | 72       | -1.58(0.42,0.25,0.36) | 1100.26(1.94,3.79) | 79.5            | -1.30(0.30,0.09,0.24) | 1099.94(2.05,4.19) |
| 14  | 1210     | -1     | 0.92               | 73.5                   | -1.16(0.30,0.11,0.26) | 1209.88(2.09,4.34) | 63.5     | -1.55(0.36,0.43,0.55) | 1210.03(2.54,6.38) | 71              | -1.14(0.29,0.10,0.25) | 1209.93(2.15,4.58) |
| 15  | 1305     | -2.24  | 4.62               | 99                     | -2.26(0.34,0.12,0.27) | 1304.97(1.19,1.41) | 90.5     | -1.68(0.36,0.45,0.58) | 1304.09(1.38,2.71) | 99.5            | -2.20(0.35,0.12,0.28) | 1305.05(0.71,0.50) |
| 16  | 1335     | 1.58   | 2.30               | 81.5                   | 2.27(0.45,0.68,0.73)  | 1335.49(1.65,2.93) | 2        | 1.27(0.25,0.14,0.31)  | 1336.25(2.99,8.25) | 88.5            | 2.06(0.46,0.44,0.60)  | 1335.31(1.78,3.25) |
| 17  | 1345     | 1      | 0.92               | 26                     | 2.03(0.52,1.32,1.03)  | 1344.29(1.51,2.75) | 1        | 1.07(0.17,0.02,0.12)  | 1342.5(3.54,12.5)  | 27              | 1.65(0.42,0.59,0.68)  | 1345.09(0.68,0.46) |
| 18  | 1365     | -1.73  | 2.76               | 94.5                   | -1.64(0.38,0.15,0.30) | 1365.21(1.25,1.60) | 40.5     | -1.29(0.22,0.24,0.44) | 1365.99(1.76,4.05) | 94              | -1.56(0.35,0.15,0.31) | 1365.16(1.02,1.06) |
| 19  | 1800     | 0.71   | 0.46               | 41.5                   | 1.03(0.27,0.17,0.33)  | 1799.49(2.36,5.76) | 18       | 1.31(0.23,0.41,0.59)  | 1800.08(2.62,6.69) | 44              | 0.99(0.26,0.15,0.28)  | 1799.55(2.80,7.95) |
| 20  | 2300     | 0.89   | 0.73               | 59                     | 1.05(0.24,0.08,0.22)  | 2299.84(2.23,4.97) | 33.5     | 1.27(0.22,0.20,0.38)  | 2299.90(2.12,4.43) | 55              | 1.05(0.24,0.08,0.22)  | 2299.64(2.32,5.45) |

**Table S6 | Comparison of genome-wide composite interval mapping (CIM) with CIM and empirical Bayes in backcross with 400 individuals, 20 QTL and 3 interactions (200 replicates)**

| QTL | Position | Effect | r <sup>2</sup> (%) | Genome-wide CIM (GCIM) |                       |                    | CIM      |                        |                     | Empirical Bayes |                       |                     |
|-----|----------|--------|--------------------|------------------------|-----------------------|--------------------|----------|------------------------|---------------------|-----------------|-----------------------|---------------------|
|     |          |        |                    | Power(%)               | Effect(SD,MSE,MAD)    | Position(SD,MSE)   | Power(%) | Effect(SD,MSE,MAD)     | Position(SD,MSE)    | Power(%)        | Effect(SD,MSE,MAD)    | Position(SD,MSE)    |
| 1   | 50       | 4.47   | 17.27              | 100                    | 4.50(0.32,0.10,0.24)  | 50.04(0.78,0.61)   | 100      | 4.53(0.34,0.12,0.28)   | 49.97(0.74,0.55)    | 100             | 4.47(0.30,0.09,0.23)  | 50(0,0)             |
| 2   | 125      | 3.16   | 8.63               | 100                    | 3.19(0.29,0.08,0.23)  | 125.03(1.14,1.29)  | 99.5     | 2.99(0.45,0.23,0.40)   | 124.93(1.11,1.24)   | 100             | 3.14(0.28,0.08,0.22)  | 125(0.50,0.25)      |
| 3   | 200      | -2.24  | 4.34               | 98.5                   | -2.31(0.37,0.14,0.29) | 199.97(1.56,2.42)  | 90       | -2.78(0.55,0.59,0.66)  | 200.58(1.61,2.9)    | 99              | -2.26(0.35,0.12,0.27) | 200.10(1.33,1.77)   |
| 4   | 235      | -1.58  | 2.16               | 86                     | -1.61(0.32,0.10,0.26) | 234.74(2.02,4.12)  | 60       | -2.13(0.80,0.93,0.66)  | 234.46(1.90,3.88)   | 87              | -1.61(0.31,0.10,0.25) | 234.74(2.17,4.74)   |
| 5   | 350      | 2.24   | 4.34               | 65                     | 2.62(0.76,0.72,0.56)  | 350.7(1.65,3.21)   | 71.5     | 4.92(0.33,7.27,2.68)   | 352.30(1.20,6.73)   | 91.5            | 2.31(0.40,0.17,0.34)  | 350.05(0.91,0.82)   |
| 6   | 360      | 3.16   | 8.63               | 95.5                   | 3.72(1.11,1.55,0.96)  | 359.53(1.32,1.95)  | 91.5     | 5.02(0.33,3.56,1.86)   | 358.32(1.11,4.04)   | 99.5            | 3.20(0.65,0.42,0.46)  | 359.95(0.50,0.25)   |
| 7   | 610      | 1.1    | 1.05               | 15                     | 1.47(0.33,0.24,0.41)  | 609.13(2.15,5.2)   | 1.5      | 1.07(0.04,0.002,0.04)  | 610(0,0)            | 8.5             | 1.40(0.30,0.18,0.33)  | 608.53(2.35,7.35)   |
| 8   | 630      | -1.1   | 1.05               | 13                     | -1.52(0.34,0.29,0.48) | 630.04(1.91,3.5)   | 1.5      | -1.19(0.003,0.01,0.09) | 630(0,0)            | 6.5             | -1.52(0.31,0.27,0.45) | 629.62(1.39,1.92)   |
| 9   | 800      | 0.77   | 0.51               | 29                     | 1.06(0.15,0.11,0.29)  | 800.34(2.32,5.41)  | 21       | 1.36(0.31,0.43,0.59)   | 800.11(2.51,6.15)   | 24.5            | 1.05(0.13,0.10,0.28)  | 800(2.70,7.14)      |
| 10  | 890      | 1.73   | 2.59               | 71                     | 1.97(0.33,0.16,0.32)  | 890.84(1.85,4.11)  | 53.5     | 2.18(0.40,0.36,0.47)   | 889.62(1.41,2.10)   | 83              | 1.86(0.32,0.12,0.28)  | 890.15(1.60,2.56)   |
| 11  | 905      | 3.81   | 12.55              | 100                    | 4.10(0.90,0.90,0.72)  | 904.98(1.19,1.41)  | 99.5     | 6.86(0.48,9.53,3.08)   | 905.08(1.24,1.53)   | 99.5            | 3.97(0.69,0.50,0.53)  | 904.98(0.42,0.17)   |
| 12  | 920      | 2.25   | 4.38               | 97                     | 2.26(0.42,0.18,0.34)  | 919.38(1.73,3.36)  | 82.5     | 2.47(0.83,0.74,0.49)   | 920.02(1.59,2.52)   | 99              | 2.24(0.50,0.25,0.36)  | 919.95(1.42,2.02)   |
| 13  | 1100     | -1.3   | 1.46               | 81.5                   | -1.36(0.25,0.07,0.21) | 1100.28(2.13,4.57) | 71       | -1.52(0.28,0.12,0.27)  | 1100.04(2.06,4.20)  | 82.5            | -1.37(0.26,0.07,0.22) | 1100.09(2.37,5.61)  |
| 14  | 1210     | -1     | 0.86               | 52                     | -1.17(0.19,0.06,0.19) | 1210.15(2.64,6.94) | 63.5     | -1.54(0.32,0.40,0.54)  | 1209.96(2.47,6.04)  | 52              | -1.17(0.19,0.06,0.20) | 1210.19(3.19,10.10) |
| 15  | 1305     | -2.24  | 4.34               | 97.5                   | -2.55(0.43,0.18,0.33) | 1305.10(1.61,2.61) | 89       | -1.65(0.31,0.44,0.60)  | 1304.33(1.33,2.20)  | 98              | -2.18(0.42,0.18,0.33) | 1305.03(1.56,2.42)  |
| 16  | 1335     | 1.58   | 2.16               | 76.5                   | 2.28(0.44,0.68,0.74)  | 1335.62(1.81,3.65) | 0        |                        |                     | 80              | 2.10(0.45,0.47,0.59)  | 1335.69(2.21,5.31)  |
| 17  | 1345     | 1      | 0.86               | 18                     | 2.33(0.49,2.00,1.33)  | 1344.56(1.99,4.06) | 0        |                        |                     | 13              | 2.23(0.51,1.75,1.23)  | 1345.58(1.63,2.88)  |
| 18  | 1365     | -1.73  | 2.59               | 80                     | -1.62(0.34,0.12,0.30) | 1365.52(1.70,3.14) | 24.5     | -1.31(0.23,0.23,0.46)  | 1365.69(1.75,3.47)  | 72              | -1.57(0.34,0.14,0.31) | 1365.37(1.85,3.55)  |
| 19  | 1800     | 0.71   | 0.44               | 21.5                   | 1.02(0.14,0.12,0.31)  | 1799.47(3.06,9.42) | 12       | 1.29(0.32,0.43,0.58)   | 1800.17(3.23,10.00) | 20              | 1.06(0.15,0.15,0.35)  | 1799.63(2.86,8.13)  |
| 20  | 2300     | 0.89   | 0.68               | 37                     | 1.14(0.20,0.10,0.25)  | 2300.19(2.54,6.38) | 21       | 1.35(0.40,0.37,0.46)   | 2300.18(2.85,7.93)  | 33.5            | 1.13(0.17,0.09,0.24)  | 2300.60(2.82,8.21)  |

Table S7 | Main-effect QTL identified by GCIM and some common QTL identified by CIM, ICIM and empirical Bayes.

| Trait | Chr | Posi (cM) | Genome-wide CIM (GCIM) |       |          |                    | CIM                        |            |             |                    |             | Empirical Bayes (multi-marker analysis) |       |          |                    | Würschum <i>et al.</i> (2014) |        |                    |
|-------|-----|-----------|------------------------|-------|----------|--------------------|----------------------------|------------|-------------|--------------------|-------------|-----------------------------------------|-------|----------|--------------------|-------------------------------|--------|--------------------|
|       |     |           | Marker interval        | LOD   | Additive | r <sup>2</sup> (%) | Marker interval            | LOD        | Additive    | r <sup>2</sup> (%) | Population  | marker                                  | LOD   | Additive | r <sup>2</sup> (%) | Marker                        | Effect | r <sup>2</sup> (%) |
| DS1   | 1A  | 79.8      | wPt-7339               | 3.49  | 0.23     | 0.67               |                            |            |             |                    |             | wPt-7339                                | 4.81  | 0.30     | 1.39               |                               |        |                    |
|       | 2A  | 48.9      | wPt-7026               |       |          |                    |                            |            |             |                    |             |                                         |       |          |                    | wPt-7026                      | -0.23  | 0.2                |
|       | 2A  | 55.8      | rPt-505274~wPt5251     | 8.93  | -0.42    | 2.53               | wPt-6393~wPt3114, wPt-5251 | 2.62~4.24  | -0.93~0.42  | 5.01~28.78         | DH07,EAW74  |                                         |       |          |                    |                               |        |                    |
|       | 2A  | 62.1      |                        |       |          |                    | wPt-3114~wPt-7466          | 4.29       | -0.61       | 10.38              | DH06        | wPt-3114                                | 7.66  | -0.32    | 1.68               | wPt-3114                      | -0.30  | 2.2                |
|       | 4A  | 17.1      | tPt-512917             | 4.87  | 0.40     | 1.42               |                            |            |             |                    |             | tPt-512917                              | 4.98  | 0.44     | 1.99               | tPt-512917                    | 0.43   | 1.7                |
|       | 4A  | 41.1      | wPt-5857               | 3.79  | -0.26    | 0.87               | wPt-5857~wPt-5951          | 2.66~3.30  | -0.89~-0.65 | 12.93~13.41        | DH07,EAW74  |                                         |       |          |                    | wPt-5857                      | -0.31  | 0.6                |
|       | 4A  | 103.8     |                        |       |          |                    |                            |            |             |                    |             |                                         |       |          |                    | wPt-7391                      | -0.19  | 0.7                |
|       | 5A  | 34.5      | tPt-3642               | 3.91  | 0.32     | 0.90               |                            |            |             |                    |             | wPt-2329                                | 2.98  | 0.34     | 1.20               | wPt-2329                      | 0.29   | 0.9                |
|       | 6A  | 4.7       | wPt-8443~wPt-9832      | 4.37  | -0.93    | 12.00              |                            |            |             |                    |             |                                         |       |          |                    |                               |        |                    |
|       | 6A  | 14.7      |                        |       |          |                    |                            |            |             |                    |             |                                         |       |          |                    | wPt-7330                      | 0.27   | 1.0                |
|       | 6A  | 62.4      | tPt-4209               | 17.60 | 0.56     | 3.55               | wPt0902,tPt-4209           | 2.66~10.97 | -0.75~0.33  | 3.11~10.89         | EAW74,EAW78 | tPt-4209                                | 13.80 | 0.55     | 4.01               | tPt-4209                      | 0.46   | 4.1                |
|       | 7A  | 53.2      |                        |       |          |                    | wPt-7785                   | 2.92       | -0.35       | 2.35               | EAW78       |                                         |       |          |                    | wPt-7785                      | -0.18  | 0.6                |
|       | 7A  | 65.1      | wPt-8377~wPt-7299      | 3.53  | 0.30     | 1.27               | wPt-1961                   | 4.04       | 0.41        | 3.21               | EAW78       |                                         |       |          |                    |                               |        |                    |
|       | 7A  | 118.9     | wPt-4489~wPt0494p7A    | 2.84  | 0.22     | 0.66               |                            |            |             |                    |             |                                         |       |          |                    | wPt-0494                      | 0.21   | 0.9                |
|       | 1B  | 26.2      | wPt-2526~wPt4532p1B    | 5.22  | 0.34     | 1.60               |                            |            |             |                    |             | wPt-2526                                | 3.72  | 0.26     | 1.04               | wPt-5003                      | 0.45   | 1.8                |



|    |       |                  |       |       |       |                                |           |            |             |             |            |       |       |       |            |       |      |
|----|-------|------------------|-------|-------|-------|--------------------------------|-----------|------------|-------------|-------------|------------|-------|-------|-------|------------|-------|------|
| 2B | 148.6 | tPt-1663         | 7.50  | 0.35  | 1.42  | tPt-1663,wPt-0100~<br>wPt-9274 | 2.77~4.85 | 0.44~0.54  | 5.61~6.00   | EAW74,EAW78 | tPt-1663   | 6.69  | 0.39  | 2.01  | tPt-1663   | 0.39  | 2.9  |
| 3B | 98.7  | wPt-9422         | 5.11  | -0.28 | 0.97  |                                |           |            |             |             |            |       |       |       | tPt-513153 | 0.15  | 0.4  |
| 4B | 54.9  |                  |       |       |       | wPt-6016                       | 3.51      | 0.37       | 3.87        | EAW74       |            |       |       |       | wPt-6016   | 0.33  | 0.7  |
| 5B | 39.9  | wPt-1548         | 11.46 | 0.63  | 3.02  | wPt-4936                       | 7.42      | -0.59      | 7.08        | EAW78       | wPt-7101   | 6.27  | -0.42 | 2.70  | wPt-1548   | 0.52  | 1.5  |
| 6B | 5     | wPt-3304         | 3.90  | 0.28  | 0.89  |                                |           |            |             |             |            |       |       |       | wPt-3304   | 0.32  | 0.6  |
| 6B | 53.2  |                  |       |       |       | wPt-8721                       | 3.67      | -0.54      | 7.12        | DH06        |            |       |       |       | wPt-2400   | 0.20  | 0.7  |
| 6B | 62.7  | wPt-5037~wPt9124 | 7.17  | -0.38 | 1.80  | wPt-8554~tPt-3689              | 3.46~7.95 | 0.53~0.79  | 7.28~20.63  | DH06,DH07   |            |       |       |       |            |       |      |
| 6B | 76.5  |                  |       |       |       | wPt-3581                       | 9.38      | 0.89       | 22.34       | DH07        |            |       |       |       | wPt-3581   | 0.33  | 1.5  |
| 7B | 68.8  | wPt-8919         | 7.09  | -0.35 | 1.44  | wPt-8919                       | 5.70      | -0.49      | 6.76        | EAW74       | wPt-8919   | 6.72  | -0.38 | 2.00  | wPt-1149   | 0.52  | 2.8  |
| 4R | 9.9   | rPt-389770       | 7.89  | 0.65  | 5.00  | wPt-8336                       | 10.12     | 0.90       | 21.64       | DH06        | rPt-389770 | 5.25  | 0.63  | 5.56  | rPt-389770 | 0.60  | 1.5  |
| 4R | 44    | rPt-507237       | 11.60 | 0.39  | 2.11  | tPt-513924,<br>rPt-507237      | 4.49~6.07 | -0.50~0.46 | 4.06~7.16   | EAW74,EAW78 | rPt-507237 | 7.25  | 0.36  | 2.11  | rPt-509552 | 0.48  | 2.0  |
| 4R | 66.3  | rPt-390324       | 17.23 | -0.74 | 4.82  | tPt-513520,rPt-2245            | 4.91~6.35 | -0.58~0.70 | 11.44~12.72 | DH06,DH07   | rPt-390324 | 17.01 | -0.83 | 7.21  | rPt-506436 | 0.51  | 2.3  |
| 5R | 18.9  | rPt-399681       | 41.49 | 1.27  | 22.82 | rPt-399681                     | 33.18     | 1.42       | 41.87       | EAW78       | rPt-399681 | 37.50 | 1.32  | 29.23 | rPt-399681 | 1.33  | 13.0 |
| 5R | 36.5  | rPt-508041       | 4.93  | 0.40  | 2.32  | rPt-508041~rPt-398691          | 4.09      | 0.64       | 9.83        | EAW74       |            |       |       |       | rPt-508041 | 0.38  | 0.7  |
| 5R | 62.9  | rPt-507480       | 4.44  | -0.30 | 1.28  |                                |           |            |             |             |            |       |       |       |            |       |      |
| 5R | 81.3  |                  |       |       |       |                                |           |            |             |             |            |       |       |       | rPt-505265 | 0.09  | 0.1  |
| 6R | 39.6  | tPt-4479         | 8.54  | 0.43  | 1.89  | rPt-8205                       | 14.35     | 0.84       | 19.63       | EAW74       | tPt-4479   | 4.26  | 0.51  | 3.14  |            |       |      |
| 6R | 41.2  | tPt-507562       | 11.75 | -0.40 | 2.16  | rPt-390525                     | 2.74      | 0.35       | 2.48        | EAW78       |            |       |       |       | rPt-401125 | -0.54 | 3.5  |

|     |    |        |                     |      |       |       |                                          |           |            |             |                      |            |       |       |          |            |       |     |
|-----|----|--------|---------------------|------|-------|-------|------------------------------------------|-----------|------------|-------------|----------------------|------------|-------|-------|----------|------------|-------|-----|
|     | 6R | 62.8   |                     |      |       |       | rPt-399543                               | 2.98      | 0.36       | 2.75        | EAW78                |            |       |       |          | rPt-508379 | 0.24  | 0.5 |
|     | 6R | 72.7   | rPt-390698          | 5.69 | -0.39 | 1.30  |                                          |           |            |             |                      |            |       |       |          | rPt-390698 | 0.43  | 0.9 |
|     | 7R | 40.7   | rPt-401882          | 4.86 | 0.32  | 1.18  |                                          |           |            |             |                      |            |       |       |          |            |       |     |
|     | 7R | 43.3   | rPt-390741          | 4.24 | -0.31 | 1.25  |                                          |           |            |             |                      | rPt-390741 | 3.41  | -0.31 | 1.47     | rPt-390741 | -0.35 | 1.4 |
| DS2 | 2A | 62.1   | wPt-3114            | 5.41 | -0.24 | 0.93  | wPt-6393                                 | 5.90      | 0.43       | 8.00        | EAW74                | wPt-3114   | 5.16  | -0.26 | 1.49     | wPt-3114   | 0.30  | 2.9 |
|     | 6A | 15.6   | wPt-9075            | 3.98 | -0.25 | 0.90  |                                          |           |            |             |                      | wPt-9075   | 3.82  | -0.25 | 1.26     |            |       |     |
|     | 6A | 58.2   | wPt-0902            | 9.19 | -0.59 | 3.43  | tPt-513137~tPt-513992                    | 3.85~6.48 | -2.78~1.42 | 13.19~19.88 | DH06,DH07,EAW78,     | tPt-4209   | 8.05  | 0.41  | 3.04     | wPt-2077   | 0.69  | 2.7 |
|     | 7A | 66     | wPt-7299            | 4.25 | 0.31  | 1.25  | wPt-8337                                 | 6.53      | 1.52       | 26.35       | DH06                 |            |       |       | wPt-7299 | 0.35       | 1.5   |     |
|     | 2B | 148.6  | tPt-1663            | 9.72 | 0.41  | 2.22  | tPt-512890~wPt2106,<br>wPt-2106,tPt-1663 | 2.74~5.13 | -1.66~0.61 | 3.56~21.52  | DH06,EAW74,<br>EAW78 | tPt-1663   | 10.89 | 0.46  | 3.87     |            |       |     |
|     | 2B | 151.05 | wPt-0100~wPt-9274   | 2.99 | 1.25  | 25.37 | rPt-398598                               | 5.98      | 0.66       | 7.02        | EAW78                |            |       |       |          |            |       |     |
|     | 3B | 0      | wPt-9496            | 2.57 | -0.23 | 0.60  | wPt-9496~wPt-2426p3B                     | 3.92      | 1.47       | 16.01       | EAW74                | wPt-9496   | 3.55  | -0.30 | 1.43     |            |       |     |
|     | 3B | 98.7   | wPt-9422            | 3.33 | -0.23 | 0.74  |                                          |           |            |             |                      |            |       |       |          | wPt-9422   | -0.27 | 0.4 |
|     | 5B | 39.9   | wPt-1548            | 6.64 | 0.49  | 2.06  | wPt-4936,wPt-2607~<br>wPt-1548,wPt-7101  | 3.85~7.71 | -1.48~1.42 | 4.89~27.52  | DH06,EAW74,<br>EAW78 | wPt-1548   | 5.80  | 0.47  | 2.71     | wPt-1548   | 0.43  | 1.6 |
|     | 5B | 59.1   | wPt-1733            | 4.22 | 0.38  | 1.32  | wPt-9300,wPt-6265                        | 4.25~5.79 | -1.65~0.35 | 5.62~21.78  | DH06,EAW74           |            |       |       |          | wPt-1733   | 0.45  | 1.3 |
|     | 6B | 76.5   | wPt-3581            | 4.81 | 0.37  | 1.23  | tPt-514287~tPt-9132,<br>wPt-3581         | 7.35~8.99 | -1.19~0.57 | 20.94~33.63 | DH06,DH07            |            |       |       |          | wPt-3581   | 0.33  | 1.3 |
|     | 6B | 116.95 | wPt-0406~rPt-505542 | 3.30 | 0.49  | 3.81  | tPt-513425                               | 4.36      | 1.49       | 17.69       | DH06                 |            |       |       |          | rPt-505542 | 0.22  | 1.1 |
|     | 7B | 67.4   | wPt-8312            | 4.42 | 0.28  | 1.05  | wPt-9133,wPt-8312,<br>wPt-1149           | 3.03~5.61 | -1.54~2.14 | 6.99~20.48  | DH06,EAW74,<br>EAW78 | wPt-8312   | 3.92  | 0.28  | 1.49     |            |       |     |

|     |    |       |                          |       |       |       |                                |           |             |             |                      |             |       |       |       |                           |             |         |
|-----|----|-------|--------------------------|-------|-------|-------|--------------------------------|-----------|-------------|-------------|----------------------|-------------|-------|-------|-------|---------------------------|-------------|---------|
|     | 3R | 35.4  |                          |       |       |       |                                |           |             |             |                      |             |       |       |       | rPt-402572                | -0.22       | 0.8     |
|     | 4R | 63.9  | rPt-505489               | 10.26 | 0.42  | 2.42  | tPt-4576,rPt-398587            | 2.85~5.81 | -1.31~2.48  | 14.47~15.30 | DH07,EAW74,<br>EAW78 |             |       |       |       | rPt-509321,r<br>Pt-389618 | -0.50~-0.49 | 0.1~3.1 |
|     | 5R | 18.9  | rPt-399681               | 44.26 | 1.33  | 28.40 | rPt-507500                     | 22.73     | 1.52        | 37.9        | EAW78                | rPt-399681  | 41.15 | 1.37  | 42.92 | rPt-399681                | 1.45        | 18.3    |
|     | 6R | 41.2  |                          |       |       |       | rPt-507115                     | 8.47      | -0.53       | 12.52       | EAW74                |             |       |       |       | rPt-507562                | -0.36       | 2.6     |
|     | 7R | 46.9  | wPt-1598~rPt-505136      | 7.47  | 0.31  | 1.51  | rPt-400849                     | 4.42      | 1.55        | 17.96       | DH07                 |             |       |       |       | rPt-401147                | 0.39        | 0.8     |
| DS3 | 2A | 61.16 | wPt-6393~wPt-3114        | 14.32 | -0.43 | 6.20  | wPt-8826,wPt-3114~<br>wPt-7466 | 2.63-7.25 | -0.48-0.27  | 3.98~7.96   | DH06,EAW74,<br>EAW78 | wPt-3114    | 12.76 | -0.30 | 3.72  | wPt-3114                  | -0.32       | 4.9     |
|     | 4A | 14.7  | wPt-6867                 | 5.13  | 0.31  | 1.90  |                                |           |             |             |                      |             |       |       |       |                           |             |         |
|     | 4A | 40.1  | wPt-5428                 | 3.19  | -0.16 | 0.77  | wPt-5857~wPt-5951              | 2.60      | -0.54       | 20.16       | DH07                 |             |       |       |       |                           |             |         |
|     | 5A | 2.5   | wPt-5096                 | 4.57  | -0.29 | 1.39  | wPt-5787,wPt-5096              | 2.77~5.08 | -0.37~0.24  | 7.90~8.07   | DH06,EAW74           | wPt-5096    | 5.18  | -0.33 | 2.26  |                           |             |         |
|     | 5A | 47.85 | wPt-7201~wPt-7769        | 4.07  | -0.41 | 4.61  |                                |           |             |             |                      |             |       |       |       | wPt-7255                  | -0.22       | 0.7     |
|     | 6A | 14.5  |                          |       |       |       |                                |           |             |             |                      |             |       |       |       | wPt-4017                  | 0.15        | 1.1     |
|     | 6A | 38.8  | wPt-3965                 | 3.86  | 0.16  | 0.85  |                                |           |             |             |                      |             |       |       |       |                           |             |         |
|     | 6A | 58.2  | wPt-0902                 | 7.96  | -0.42 | 3.67  | wPt-0902,tPt-513992            | 2.85~8.15 | -0.52~1.27  | 8.49~13.85  | DH06,EAW78           | wPt-0902    | 7.48  | -0.44 | 4.99  | wPt-0902                  | -0.50       | 5.0     |
|     | 7A | 12    | tPt-512944               | 3.19  | -0.16 | 0.83  | rPt-389464,rPt-4199            | 2.75~5.02 | -1.28~-0.37 | 7.91~13.84  | DH06,EAW74           | rPt-4199    | 3.49  | -0.18 | 1.20  |                           |             |         |
|     | 7A | 65.05 | wPt-8377~wPt-7299        | 3.78  | 0.24  | 1.88  |                                |           |             |             |                      | wPt-345934  | 3.99  | 0.21  | 1.43  |                           |             |         |
|     | 1B | 38.02 | wPt-0097~wPt-7476        | 2.85  | -0.20 | 1.36  | wPt-3765                       | 2.83      | 0.22        | 6.92        | DH06                 |             |       |       |       |                           |             |         |
|     | 2B | 130.9 | wPt-6199~wPt-9958p2<br>B | 5.99  | 0.26  | 2.22  |                                |           |             |             |                      | wPt-9958p2B | 3.81  | 0.17  | 1.18  | wPt-9958                  | 0.20        | 1.9     |
|     | 3B | 98.7  |                          |       |       |       | tPt-513153                     | 2.41      | 0.37        | 6.52        | EAW74                |             |       |       |       | wPt-9422                  | -0.15       | 0.2     |

|    |       |                   |       |       |       |                   |       |       |       |       |            |       |       |       |            |       |      |
|----|-------|-------------------|-------|-------|-------|-------------------|-------|-------|-------|-------|------------|-------|-------|-------|------------|-------|------|
| 6B | 50.73 | wPt-5408~wPt-7426 | 3.51  | -0.49 | 8.04  |                   |       |       |       |       |            |       |       |       | wPt-7426   | -0.20 | 1.1  |
| 6B | 76.5  | wPt-3581          | 5.02  | 0.28  | 1.47  | wPt-3581          | 6.56  | 0.40  | 17.16 | DH07  | wPt-3581   | 4.69  | 0.29  | 2.00  | wPt-3581   | 0.30  | 1.4  |
| 7B | 68.8  | wPt-8919          | 4.84  | -0.21 | 1.30  | wPt-9798~wPt-9133 | 4.41  | 0.45  | 10.36 | EAW74 | wPt-9133   | 4.63  | 0.22  | 1.79  |            |       |      |
| 3R | 35.2  |                   |       |       |       | rPt-507396        | 2.55  | -0.28 | 2.45  | EAW78 |            |       |       |       | rPt-507396 | -0.33 | 0.9  |
| 4R | 65.4  | rPt-410866        | 5.00  | -0.19 | 1.14  | rPt-401323        | 2.68  | -0.24 | 7.09  | DH07  | rPt-410866 | 3.70  | -0.18 | 1.26  | rPt-410866 | -0.22 | 1.9  |
| 5R | 18.9  | rPt-399681        | 44.93 | 0.98  | 32.70 | rPt-399681        | 27.27 | 1.02  | 35.02 | EAW78 | rPt-399681 | 38.78 | 0.98  | 40.27 | rPt-399681 | 1.04  | 17.4 |
| 5R | 35.2  | rPt-402367        | 3.42  | 0.26  | 2.22  |                   |       |       |       |       |            |       |       |       | rPt-402367 | 0.30  | 1.8  |
| 6R | 46.2  | rPt-401125        | 5.97  | -0.24 | 1.60  | rPt-398551        | 2.61  | 1.28  | 13.86 | DH06  |            |       |       |       | rPt-401125 | -0.24 | 1.4  |
| 7R | 40.4  |                   |       |       |       | rPt-410852        | 2.77  | -0.32 | 2.95  | EAW78 |            |       |       |       | rPt-400878 | 0.21  | 1.1  |

---

**Table S8 | Probabilities in the paired  $t$  test for average statistical power and mean absolute deviation (MAD) among genome-wide composite interval mapping (CIM), CIM and empirical Bayes**

| Case                                                                                                           | Genome-wide CIM (GCIM) & CIM |        | Empirical Bayes & CIM |        | Genome-wide CIM & empirical Bayes |         |
|----------------------------------------------------------------------------------------------------------------|------------------------------|--------|-----------------------|--------|-----------------------------------|---------|
|                                                                                                                | Power                        | MAD    | Power                 | MAD    | Power                             | MAD     |
| <b>Monte Carlo simulation experiment I (20 main-effect QTL were simulated)</b>                                 |                              |        |                       |        |                                   |         |
| 20 main-effect QTL                                                                                             | 2.09E-4                      | 0.0253 | 1.60E-4               | 0.0162 | 0.4790                            | 0.0196  |
| Small effect QTL                                                                                               | 0.0178                       | 0.0115 | 0.0173                | 0.0102 | 0.7177                            | 6.84E-4 |
| Closely linked QTL                                                                                             | 0.0049                       | 0.1121 | 0.0039                | 0.0773 | 0.5813                            | 0.0247  |
| <b>Monte Carlo simulation experiment I (20 main-effect QTL along with polygenic background were simulated)</b> |                              |        |                       |        |                                   |         |
| 20 main-effect QTL                                                                                             | 1.27E-4                      | 0.0576 | 1.83E-4               | 0.0317 | 0.5237                            | 0.0164  |
| Small effect QTL                                                                                               | 0.0147                       | 0.0034 | 0.0253                | 0.0053 | 0.3955                            | 0.5456  |
| Closely linked QTL                                                                                             | 0.0039                       | 0.1930 | 0.0031                | 0.1205 | 0.1846                            | 0.0182  |
| <b>Monte Carlo simulation experiment I (20 main-effect QTL along with epistatic background were simulated)</b> |                              |        |                       |        |                                   |         |
| 20 main-effect QTL                                                                                             | 0.0056                       | 0.0249 | 0.0035                | 0.0220 | 0.6612                            | 0.0322  |
| Small effect QTL                                                                                               | 0.4219                       | 0.0024 | 0.5909                | 0.0026 | 0.0997                            | 0.5707  |
| Closely linked QTL                                                                                             | 0.0326                       | 0.1370 | 0.0167                | 0.1070 | 0.5362                            | 0.0272  |

**Table S9 | QTL mapping derived from inclusive composite interval mapping (ICIM) in the first to third Monte Carlo simulation experiments (200 replicates)**

| QTL | The first simulation experiment |                       |                    | The second simulation experiment |                       |                    | The third simulation experiment |                       |                    |
|-----|---------------------------------|-----------------------|--------------------|----------------------------------|-----------------------|--------------------|---------------------------------|-----------------------|--------------------|
|     | Power (%)                       | Effect (SD,MSE,MAD)   | Position (SD,MSE)  | Power (%)                        | Effect (SD,MSE,MAD)   | Position (SD,MSE)  | Power (%)                       | Effect (SD,MSE,MAD)   | Position (SD,MSE)  |
| 1   | 100                             | 4.47(0.17,0.03,0.14)  | 50.02(0.26,0.07)   | 100                              | 4.45(0.36,0.13,0.29)  | 50.00(0.33,0.11)   | 100                             | 4.49(0.31,0.10,0.24)  | 50.02(0.50,0.25)   |
| 2   | 100                             | 3.15(0.21,0.04,0.16)  | 125.03(0.54,0.29)  | 100                              | 3.14(0.33,0.11,0.27)  | 124.96(0.62,0.39)  | 99.5                            | 3.16(0.32,0.10,0.25)  | 125.01(0.98,0.95)  |
| 3   | 99.5                            | -2.26(0.22,0.05,0.17) | 199.95(0.74,0.54)  | 99.5                             | -2.23(0.33,0.11,0.26) | 200.09(1.22,1.48)  | 99                              | -2.32(0.38,0.15,0.30) | 200.20(1.37,1.90)  |
| 4   | 98                              | -1.57(0.21,0.05,0.16) | 235.01(1.26,1.58)  | 94.5                             | -1.66(0.32,0.11,0.25) | 235.08(1.14,1.30)  | 85                              | -1.63(0.32,0.11,0.26) | 234.78(1.91,3.67)  |
| 5   | 99.5                            | 2.24(0.30,0.09,0.24)  | 349.92(0.74,0.55)  | 99                               | 2.29(0.42,0.18,0.35)  | 349.98(1.06,1.11)  | 86.5                            | 2.46(0.73,0.58,0.46)  | 350.02(1.23,1.51)  |
| 6   | 100                             | 3.20(0.33,0.11,0.25)  | 360.01(0.51,0.26)  | 99.5                             | 3.25(0.55,0.31,0.39)  | 359.99(0.62,0.38)  | 95.5                            | 3.43(0.77,0.65,0.57)  | 359.83(1.07,1.17)  |
| 7   | 20                              | 1.26(0.24,0.08,0.24)  | 609.93(1.37,1.83)  | 25                               | 1.23(0.35,0.13,0.30)  | 609.72(1.39,1.96)  | 5                               | 1.33(0.44,0.23,0.34)  | 609.9(2.51,5.7)    |
| 8   | 25                              | -1.19(0.29,0.09,0.26) | 630.10(1.69,2.82)  | 23                               | -1.27(0.38,0.17,0.34) | 630.79(5.45,29.66) | 4                               | -1.40(0.35,0.20,0.39) | 629.38(0.92,1.13)  |
| 9   | 69                              | 0.83(0.14,0.02,0.13)  | 800.05(2.20,4.79)  | 37.5                             | 1.00(0.28,0.13,0.27)  | 799.95(2.12,4.43)  | 25.5                            | 1.06(0.21,0.13,0.29)  | 799.98(2.35,5.43)  |
| 10  | 100                             | 1.75(0.25,0.06,0.20)  | 889.89(1.10,1.23)  | 92                               | 1.80(0.34,0.12,0.28)  | 889.87(1.31,1.72)  | 78.5                            | 1.86(0.36,0.15,0.31)  | 889.92(1.53,2.33)  |
| 11  | 100                             | 3.84(0.32,0.11,0.25)  | 905.01(0.34,0.12)  | 100                              | 3.87(0.49,0.24,0.37)  | 904.97(0.43,0.19)  | 100                             | 4.10(0.73,0.62,0.58)  | 904.96(0.74,0.54)  |
| 12  | 99.5                            | 2.23(0.26,0.07,0.21)  | 920.05(0.63,0.40)  | 100                              | 2.23(0.38,0.14,0.30)  | 919.94(0.98,0.96)  | 97                              | 2.23(0.44,0.19,0.36)  | 920.04(1.34,1.79)  |
| 13  | 93.5                            | -1.33(0.17,0.03,0.14) | 1099.93(1.28,1.63) | 85                               | -1.33(0.30,0.09,0.24) | 1100.07(2.05,4.19) | 77                              | -1.41(0.31,0.10,0.24) | 1100.05(1.88,3.51) |
| 14  | 88                              | -1.02(0.19,0.03,0.15) | 1210.00(1.91,3.64) | 66                               | 1.14(0.30,0.11,0.26)  | 1210.08(1.96,3.81) | 47                              | -1.19(0.26,0.10,0.23) | 1209.88(2.52,6.29) |
| 15  | 99.5                            | -2.24(0.24,0.06,0.18) | 1304.93(0.81,0.66) | 99                               | -2.23(0.35,0.12,0.28) | 1304.92(1.05,1.10) | 92.5                            | -2.28(0.45,0.20,0.35) | 1304.94(1.31,1.71) |
| 16  | 91                              | 1.95(0.45,0.34,0.50)  | 1335.55(1.31,2.01) | 83.5                             | 2.09(0.46,0.47,0.58)  | 1335.54(1.43,2.32) | 74.5                            | 2.14(0.42,0.49,0.61)  | 1335.45(1.76,3.28) |
| 17  | 40.5                            | 1.44(0.36,0.33,0.44)  | 1345.01(1.50,2.23) | 25.5                             | 1.75(0.50,0.81,0.75)  | 1344.47(1.92,3.90) | 9                               | 2.22(0.48,1.70,1.22)  | 1344.78(2.21,4.67) |
| 18  | 96.5                            | -1.61(0.30,0.11,0.27) | 1365.29(1.23,1.60) | 89                               | -1.62(0.38,0.16,0.32) | 1365.31(1.35,1.92) | 67                              | -1.49(0.33,0.17,0.36) | 1365.69(1.60,3.01) |
| 19  | 66                              | 0.82(0.21,0.05,0.15)  | 1799.85(3.02,9.07) | 44                               | 0.98(0.28,0.15,0.28)  | 1799.97(2.20,4.81) | 22                              | 1.04(0.17,0.13,0.33)  | 1799.84(2.71,7.20) |
| 20  | 82                              | 0.93(0.16,0.03,0.13)  | 2300.18(1.82,3.34) | 57                               | 1.04(0.26,0.09,0.23)  | 2299.98(2.11,4.42) | 40.5                            | 1.13(0.23,0.11,0.25)  | 2300.38(2.44,6.01) |

QTL parameters in the three Monte Carlo simulation experiments were shown in Tables S1, S2 and S3, respectively.

## Simulated Datasets

Simulated\_datasets.zip is a \*.zip file that includes simulated\_datasets.csv. In the simulated experiment I, the phenotypic values are in the first column and the genotypic values for all the 481 markers are in the fourth to 484th columns. In the genotypic datasets in backcross population, 1 is AA marker genotype and -1 is Aa marker genotype. In the simulated experiment II, the phenotypic values are in the second column and the genotypic values for all the 481 markers are also in the fourth to 484th columns. In the simulated experiment III, the phenotypic values are in the third column and the genotypic values for all the 481 markers are also in the fourth to 484th columns. In other words, the genotypic datasets in the second and third simulation experiments were same as those in the first simulation experiment. In the simulated\_datasets.csv, each of 1 to 80000 rows indicates one individual, each of 4 to 484 columns represents one marker and 400 individuals consist of one sample. The  $i$ th sample consists of the  $[(i-1)\times 400+1]$ th row to  $(400i)$ th row ( $i=1, \dots, 200$ ).
